## 1 **Deep conservation of response element variants regulating plant hormonal responses**

2 Lieberman-Lazarovich Michal<sup>†</sup>, Yahav Chen, Israeli Alon and Efroni Idan

3 Institute of Plant Sciences and Genetics in Agriculture, The Robert H. Smith Faculty of Agriculture, The  
4 Hebrew University, Rehovot, Israel

5 <sup>†</sup> Current address: Institute of Plant Sciences, Volcani Center, Agricultural Research Organization, Rishon  
6 LeZion, Israel.

7 Corresponding author: Idan Efroni [Efroni.idan@mail.huji.ac.il](mailto:Efroni.idan@mail.huji.ac.il)

### 8 **Abstract**

9 Phytohormones regulate many aspects of plant life by activating transcription factors (TF) that bind  
10 sequence-specific response elements (RE) in regulatory regions of target genes. Despite their short  
11 length, REs are degenerate with a core of just 3-4bps. This degeneracy is paradoxical, as it reduces  
12 specificity, and REs are extremely common in the genome. To study whether RE degeneracy might serve  
13 a biological function we developed an algorithm for the detection of regulatory sequence conservation,  
14 and applied it to phytohormones REs in 45 angiosperms. Surprisingly, we found that specific RE variants  
15 are highly conserved in core hormone response genes. Experimental evidence showed that specific  
16 variants act to regulate the magnitude and spatial profile of hormonal response in *Arabidopsis* and  
17 tomato. Our results suggest that hormone-regulated TFs bind a spectrum of REs, each coding for a  
18 distinct transcriptional response profile. Our approach is applicable for precise editing and rational  
19 promoter design.

### 20 **Introduction**

21 Phytohormones activate coordinated transcriptional responses to regulate plant development and  
22 physiology. These responses are mediated by transcription factor (TF) families, such as *AUXIN*  
23 *RESPONSE FACTOR*, *B-CLASS RESPONSE REGULATORS* and *ABF*, which mediate the response to auxin,  
24 cytokinin and abscisic acid, respectively<sup>1-3</sup>. TFs control the expression of their target genes by binding  
25 specific nucleotide sequences, termed response elements (REs), in the regulatory region of those genes.  
26 The sequence preference of each TF is commonly portrayed as a Position Weight Matrix (PWM), or a  
27 DNA motif, which presents the contribution of each nucleotide position to the TF binding. Motifs for the  
28 main hormone response regulating TF were derived based on biochemical affinity methods and on  
29 enriched sequences in the promoters of genes induced by hormone application<sup>4,5</sup>. These motifs  
30 represent a consensus of many sequences and are composed of a short core of invariant nucleotides  
31 and several variant nucleotides which identity has little effect on TF binding. The biological role of these  
32 variant nucleotides in mediating TF-DNA binding and transcriptional response is unclear. While these  
33 motifs were determined by a consensus sequence, hormone-induced transcriptional response of  
34 individual genes varies in term of magnitude, tissue-specificity and other conditions. This gene-specific  
35 information is lost when considering only the commonalities between many regulatory sequences.

36 Indeed, when attention was paid to the different response profiles of different genes, more specific  
37 motifs and flanking sequences were identified<sup>6,7</sup>.

38 Amongst plant hormones, auxin serves a key role in plant biology and its core response pathway is  
39 conserved from basal to higher plants<sup>8</sup>. In its canonical transcriptional pathway, auxin induces the  
40 activation of a family of Auxin Response Factor (ARF) transcriptional factors, that bind the auxin  
41 response element (auxRE)<sup>1</sup>. The auxRE was first defined as the hexamer TGTCTC, and DR5, a synthetic  
42 promoter comprised of eight direct repeats of this motif, could grant auxin-responsiveness to  
43 downstream genes<sup>9-12</sup>. Biochemical characterization has shown that ARF proteins bind a more  
44 permissive TGTCNN motif<sup>13,14</sup>. Similarly to auxin, the hormone cytokinin activates target genes and  
45 increases chromatin accessibility through B-class Response Regulators (RR) that bind the degenerate RE  
46 DGATYN (cytRE; D = A,G,T; Y=C,T)<sup>15-18</sup>. Abscisic acid regulates the transcription of downstream genes via  
47 TFs, such as ABF, which bind the degenerate RE BACGTGK (abRE; B = C,G,T; K=G,T)<sup>3,19,20</sup>.

48 Recently, it was shown that modification of the DR5 element from TGTCTC to TGTCGG produced a  
49 stronger response to auxin<sup>13,21</sup>, suggesting that the variant nucleotides in the motif may affect the  
50 transcriptional response profile. However, it is unknown whether these nucleotide variants serve any  
51 function in a native sequence context or in the plant itself. It is generally accepted that the existence of  
52 purifying selection, evidenced by high sequence conservation, is a strong indicator of functionality<sup>22</sup>.  
53 Detecting conservation for specific RE variations is not trivial as rapid structural changes and the fact  
54 that RE exists in multiple copies prevents the alignment of regulatory regions. Further, due to common  
55 gene duplications in plants, ortholog assignment in divergent species is often uncertain. Indeed, plant  
56 studies of regulatory region conservation have restricted themselves to individual loci<sup>11,23</sup>, or focused on  
57 ecotypes or a limited number of species<sup>24,25</sup>.

58 Existing methods for detection of binding site conservation are geared towards the *de-novo*  
59 identification of motifs<sup>26-30</sup>. To enable the detection of variant sequence conservation, we developed  
60 Conservation of Motif Variants (CoMoVa), an alignment-free method for detection of conserved small  
61 degenerate positions in known motifs over broad evolutionary distances. We applied CoMoVa to detect  
62 conservation of hormonal REs in 45 different angiosperms, separated by approximately 150 million  
63 years<sup>31</sup> and identified highly conserved RE variants in core hormonal response genes. We then show that  
64 variants of the auxRE can fine tune the transcriptional response to the hormone.

## 65 **Results**

### 66 **CoMoVa - an algorithm for the identification of RE variant conservation**

67 To test the conservation of variant nucleotides in binding motifs, we first focused on the auxRE. Due to  
68 the high enrichment of these RE next to the transcription start site<sup>1,32</sup> (TSS), we analyzed the sequences  
69 500bp upstream and 100bp downstream to the TSS for all protein-coding genes in 45 angiosperms (Fig.  
70 1A; Supplemental Table S1). A mean 91±7% of genes carried at least one degenerate TGTCNN auxRE,  
71 and among those, there were 3.54±0.32 auxREs per gene. To determine possible motif conservation, we  
72 first identified candidate orthologs. Using the well annotated *Arabidopsis* genome as a reference, a  
73 reciprocal blast was performed to identify up to eight candidate orthologs from each species

74 (Supplemental Table S2). The candidates with the most similar set of motif variants were selected as the  
75 likely ortholog. Following ortholog assignment, the auxRE variants for each gene were arranged on a  
76 predefined species tree representing known phylogenetic relationships (Fig. 1A-D). This analysis could  
77 identify genes with little to no conservation of the variant sequences (Fig. 1B), some conservation (Fig.  
78 1C), or high levels of conservation (Fig. 1D). To quantify the conservation level, maximum parsimony  
79 optimization was applied to compute the number of motif changes (gain or loss) for each variant along  
80 the tree. The gene and motif variant conservation score was defined as the number of orthologs/species  
81 carrying the promoter with a particular variant, minus the number of changes in the tree (multiple  
82 repeats of the same variant were counted as one). This metric ranged between 0 to 45, representing no  
83 to complete conservation, respectively (Fig. 1B-D). As the distribution of dinucleotides is genome-  
84 specific<sup>33</sup> (Supplemental Fig. 1A), background rates were determined empirically, by calculating the  
85 conservation score distribution for the two variant nucleotides 8bp upstream to the core sequence  
86 (NNnnnnnnnTGTC; Supplemental Fig. 1B). The resulting distribution of conservation scores was used to  
87 compute p-values for significant conservation of variant nucleotide in the auxRE motif.

### 88 **auxRE motif variant conservation defines the core auxin response**

89 AuxREs are extremely common in the genome, but surprisingly, CoMoVa detected highly significant  
90 conservation for a set of just 112 genes. There was a marked bias in the conserved variants, with over  
91 80% of the genes carrying conserved CC, GG, GA, TC, CA, AC or AT motifs (Fig. 2A; Supplemental Table  
92 S3). GO-term enrichment analysis of genes with conserved variants revealed highly significant  
93 enrichment for response to auxin, auxin homeostasis and auxin activated signaling pathway genes (Fig.  
94 2B). As a control, GO analysis for all genes with auxRE yielded no enrichment for auxin-related terms  
95 (Supplemental Fig. 2A). The number of auxRE motifs per gene for genes with conserved auxRE motifs  
96 was  $3.28 \pm 0.49$ , which was not significantly different than the number for all genes. Interestingly, there  
97 was functional separation between genes enriched for different variants. More specifically, genes  
98 associated with a conserved TGTCGG variant were enriched for cell wall synthesis functions, genes with  
99 conserved TGTCCC were associated with auxin response, while TGTCGA variants were ascribed cellular  
100 differentiation roles. Examination of the most highly conserved genes showed that the TGTCC motif  
101 variant was conserved in promoters of four AUX/IAA genes (*IAA1/IAA2/IAA3/IAA4*) and in three GH3.3  
102 genes (Supplemental Fig. 2B). Both gene families function in the core auxin response and were shown to  
103 be auxin-induced in multiple species<sup>34</sup>. Amongst the genes containing a conserved TGTCGG variant,  
104 were the cell wall modifiers *GH9B7* and *GH9B5*, previously shown to act downstream of auxin in lateral  
105 root formation,<sup>35</sup> as well as two EXPANSIN two mannose biosynthesis genes (Supplemental Figure 2B).  
106 TGTCCC was also found in association with the transcriptional factor WUSCHEL, which acts to maintain  
107 the growth of the shoot apical meristem<sup>36</sup> and VND2, which regulates xylem formation<sup>37</sup>.

108 Three of the highly conserved variants (TGTCGG/CC/TC) were previously identified as enriched in sets of  
109 auxin-responsive genes in *Arabidopsis*<sup>5,7,9,32</sup>. To test for auxin responsiveness of genes across multiple  
110 species, we compiled five rapid auxin response-related transcriptional activity datasets in *Arabidopsis*,  
111 maize and *Brachypodium*. To add additional dicots, we also generated RNA-Seq profiles of tomato  
112 (*Solanum lycopersicum*) roots and shoots at 3h following auxin application. While auxin response

113 differed between organs and species, most of the genes with conserved variants exhibited auxin  
114 response in at least one sample (Fig. 2C).

115 We next sought to determine whether the position of the auxRE relative to the TSS is also conserved.  
116 Despite large differences in the length of intergenic regions between the species, auxREs were enriched  
117 in the +50 to -250bp region relative to the TSS across all tested angiosperms (Fig. 2D). Furthermore, for  
118 only a subset of genes, we could identify high conservation of the position of the auxRE relative to the  
119 TSS (Fig. 2E). Overall, the conservation of specific variants and the consistent biological role of genes  
120 with conserved auxRE motifs suggests that CoMoVa identified an ancient regulatory module acting  
121 downstream of auxin, guiding negative feedback and cell wall modifications. The conservation of specific  
122 auxRE variants across vast evolutionary distances suggests strong selection pressure on the variable  
123 dinucleotides, indicating their identity is important for gene function.

#### 124 **Motif variant conservation defines core response for cytokinin and abscisic acid**

125 If the conservation of variable nucleotides in promoters of core response genes is a general  
126 phenomenon, we hypothesized that applying the same algorithm to other hormonal RE will identify core  
127 target genes for these hormones. To test this hypothesis, we applied CoMoVa to characterize the  
128 conservation of the cytRE (DGATYN), which mediates the cytokinin response and appears in  $96.4 \pm 0.6\%$   
129 of the genes in all species. In agreement with our hypothesis, CoMoVa identified highly conserved  
130 AGATTT and GGATTT variants in seven of the ten A-class RRs (Fig. 3A-B). These negative feedback  
131 regulators of the cytokinin response play a role in the core cytokinin response in multiple species<sup>2</sup>.  
132 Overall, conservation of 10 motifs (out of the possible 24) was detected in 537 genes which were  
133 enriched for cell division regulators, histones and histone modifiers (Supplemental Fig. 3A; Supplemental  
134 Table S4). Multiple *HISTONE H4* and *HISTONE H2A* genes had a strongly conserved GGATCG motif, while  
135 the G1-S regulators *CYCA3;4* and *CYCD4;2* had conserved AGATTT and TGATTT motifs (Fig. 3B). Unlike  
136 the auxRE motif, no conservation of cytRE motif position relative to the TSS was detected (Supplemental  
137 Fig. 3B).

138 As an additional control, we tested the conservation of the abRE motif, which mediates the ABA  
139 response and appeared in  $21 \pm 5\%$  of all genes in all species. CoMoVa identified motif conservation  
140 (CACGTGG) in known ABA-inducible genes, such as the ABA biosynthetic enzymes *NCED2/3/5/9*<sup>38,39</sup> and  
141 members of the ABI Five Binding Protein (AFP) family<sup>40</sup> (Fig. 3C-D). GO term analysis of the 238 genes  
142 with conserved abRE motifs showed enrichment for ABA response, regulation of light responses,  
143 response to cold and seed germination (Supplemental Fig. 4A; Supplemental Table S5). Moreover,  
144 despite large differences in intergenic region length between the species, conserved abRE variants were  
145 highly enriched at -150bp from the TSS, suggesting that this position is important for the RE function  
146 (Supplemental Fig. 4B).

147 Overall, motif variant conservation appears to be prevalent and core hormonal response targets are  
148 enriched with specific variants, suggesting that this evolutionary signature can be used to identify core  
149 sets of TF targets.

## 150 **Deep conservation of motif flanking sequences**

151 Active TF binding sites are characterized by sequence conservation in regions flanking the core binding  
152 site<sup>41</sup>. Indeed, promoter mutagenesis has shown that nucleotides flanking the auxRE are critical for  
153 generating proper auxin-response<sup>11,12,42</sup>. We therefore sought to identify conservation in regions  
154 flanking the auxREs. To this end, the flanking 20bp up- and downstream for each ortholog group were  
155 aligned, centering on the conserved motif. A PWM was calculated and the information content for each  
156 position served as a measure of conservation at a specific position. As predicted, additional conserved  
157 nucleotides were identified in the vicinity of the auxRE (Figure 4A; Supplemental Table S6), which, in  
158 some cases, were quite long, such as the stem-cell regulator *WUS*, which had an 18-bp conserved region  
159 flanking the TGTCCC motif and a TCCCTTTCTA sequence 20bp upstream.

160 For many genes, conservation outside the auxRE amongst all angiosperms was weak, suggesting these  
161 sequences evolved faster than the variant nucleotides in the motif. As many aspects of gene expression  
162 profiles maybe specific to more closely related species, we applied the same algorithm to the dicots,  
163 monocots and brassicacea, separately to test whether we can find broader signs of conservation within  
164 a shorter evolutionary distances. Significantly higher levels of conservation were detected when the  
165 subtrees were analyzed, with clear divergence between monocots and dicots (Fig. 4A-B; Supplemental  
166 Table S6). The Brassicaceae family was represented by 10 species in our sample, with around 16 million  
167 years between some<sup>43</sup>. Despite this, sequence conservation around the auxRE motifs was very high. The  
168 conservation followed gene-specific patterns, but notably, declined with increasing distance from the  
169 motif, indicating nucleotides closer to the motif are more highly conserved (Fig. 4A-B). Similarly to the  
170 auxRE, sequence conservation for regulatory elements extended beyond the conserved RE for genes  
171 containing either cytRE or abRE, and declined away from it (Supplemental Fig. 5A-B; Supplemental Table  
172 S7-S8). Overall, our analysis revealed that while the general response to auxin may be defined by the  
173 short auxRE motif, the broad sequence context also tends to be conserved. Conservation beyond the  
174 motif was more pronounced within plant families, suggesting these sequences may serve family-specific  
175 common functionality.

## 176 **auxRE motif variants control the transcriptional response profile in synthetic promoters**

177 To identify a possible role of the RE variable nucleotides *in planta*, we generated four versions of the  
178 canonical DR5 synthetic promoter, containing different variants of the auxRE motif: the conserved  
179 TGTCCC, TGTTCTC, and TGTCCAC, and the non-conserved TGTCCGC (Supplemental Fig. 6A). Promoters were  
180 cloned upstream of the fluorescent protein *VENUS*, *Arabidopsis* root protoplasts were transfected with  
181 the construct, treated with auxin for 6h and fluorescence was measured using a flow cytometer. While  
182 all four variants responded to auxin in a dose-dependent manner, there was a significant difference in  
183 response magnitude, with TGTCCC eliciting the strongest and TGTCCAC the weakest response (Fig. 5A).  
184 The attenuated response of the TGTCCAC motif was unexpected, as *ARFs* bind this sequence *in vitro*<sup>13</sup>. To  
185 test whether ARF proteins can activate this motif *in planta*, we overexpressed two class A ARFs, *ARF7*  
186 and *ARF8*, together with our reporter. *ARF* overexpression successfully restored the auxin  
187 responsiveness of the TGTCCAC motif to a similar level as that recorded for TGTTCTC, suggesting that *in*

188 *planta*, a higher ARF concentration can compensate for lower activity associated with specific variant  
189 nucleotides (Fig. 5B).

190 To test how the variant nucleotides affect transcriptional response in a developmental context, we  
191 generated stable-transformed *Arabidopsis* lines of the different *DR5* variants fused to GFP, and selected  
192 a representative line (out of at least 10 independent lines). At 5 days after germination, seedlings were  
193 treated with auxin for 6h. Reporter expression and RNA levels, as measure by qPCR, recapitulated the  
194 transient expression results (Fig. 5C; Supplemental Fig. 6B). Interestingly, we observed a difference in  
195 the spatial expression pattern, where the response in TGTCAC-bearing lines was restricted to the root  
196 elongation zone, as opposite to the almost ubiquitous response of other variants. Notably, the  
197 magnitude of transcriptional response mediated by the motif variants did not correlate with its  
198 conservation level, suggesting that the conserved motifs are not merely the strongest activators, but  
199 mediate a specific response profile.

### 200 **Conserved auxRE variant fine-tunes the auxin transcriptional response in native promoters**

201 To test the impact of the motif variants in native promoters, we modified the conserved TGTCCC auxRE  
202 motif to the weak-response variant TGTCAC in the promoters of *IAA2* and *IAA4*. Both promoters had a  
203 second TGTCCC site with a 5-bp spacer, a configuration preferred by ARF dimers<sup>44,45</sup>. As this pair  
204 arrangement was perfectly conserved within the Brassicacea, we mutated both motifs (Fig. 6A-F).

205 Roots of *IAA2:GFP* plants exhibited strong fluorescence in the root tip and in the stele, which was  
206 upregulated by auxin, consistent with previous reports<sup>46,47</sup>. In contrast, roots carrying the mutated  
207 *pIAA2<sub>cac</sub>:GFP* had weak to no *IAA2* expression in the root tip and weak stele expression, with auxin  
208 triggering a mild increase in stele expression (Fig. 6G). Roots of *pIAA4<sub>cac</sub>:GFP* exhibited reduced  
209 fluorescence and auxin responsiveness compared to *pIAA4:GFP*, but the response was stronger than  
210 *pIAA2<sub>cac</sub>:GFP* (Fig. 6G), possibly due to an additional TGTCCC RE in their promoter (Fig. 6A). To verify that  
211 these changes in expression were not mediated by a position effect, we screened multiple insertion lines  
212 and found consistent effects of the C to A change in the auxRE (Fig. 6H).

### 213 **auxRE conservation enables rational design of synthetic reporters in multiple species**

214 Following our observation that the TGTCCC motif variant in the promoter of the Aux/IAA genes is an  
215 important determinant of the magnitude of transcriptional response to auxin, we asked whether we can  
216 use this motif to generate a new synthetic reporter for auxin. To maintain conserved position of the  
217 motif at -220 to -280bp to the TSS and to avoid introduction of repetitive sequences that are prone to  
218 silencing, we cloned three ~50-bp regions of conserved TGTCCC-containing motifs from three different  
219 *Arabidopsis* and *Populus trichocarpa* promoters and placed them upstream of a minimal 35S promoter  
220 (Supplemental Fig. 7). This promoter (pIAAmotif) was more sensitive to auxin and exhibited a stronger  
221 response than *DR5* in *Arabidopsis*, but was not as broad as the synthetic TGTCGG-based *Dr5v2*<sup>21</sup>, adding  
222 an intermediate tool for reporting auxin response (Fig. 6I). To determine the evolutionary conservation  
223 of these responses, we also generated tomato plants driving mRFP from the same pIAAmotif reporter.  
224 Similarly to *Arabidopsis*, the pIAAmotif reporter exhibited overlapping but broader expression domains

225 as compared with the classical DR5 in both roots and shoots (Fig. 6J-L), supporting the notion that the  
226 designed high-sensitivity promoters can be used in broad evolutionary contexts.

## 227 **Discussion**

228 How promoters encode specific transcriptional responses is still far from being fully understood. The  
229 presence of particular DNA motifs contributes to TF binding but cannot explain the complex  
230 transcriptional response of the gene. Here, we show that particular variant nucleotides in REs can tune  
231 the transcriptional response profile of the promoter and that conservation of the variants nucleotides  
232 can be used to identify ancient modules activated by the TF. For example, cytokinins have long been  
233 tightly associated with promotion of cell division, but the mechanism by which cytokinins mediate their  
234 control of the cell cycle has been elusive<sup>48</sup>. Interestingly, apart from the A-class *RR*, which are known  
235 downstream factors of cytokinin, we also identified deep conservation of specific cytREs in promoters of  
236 key histones and cell-cycle genes, suggesting that *RRs* may have direct transcriptional control on the cell  
237 cycle machinery. While the requirement for a large number of curated genomes limits the approach to  
238 identification of highly conserved core functions of the TF, increased availability of plant genomes will  
239 enable the detection of conservation between more closely related species and the identification of  
240 plant family-specific conserved regulatory regions. Furthermore, the focus of this works was on  
241 transcriptional response to hormonal signals, but a degenerate RE was defined to a large set of TF<sup>44,49</sup>  
242 and a similar approach can be applied them.

243 Motif variant conservation can be used to apply rational promoter design. For example, the recently  
244 developed 6xABRE synthetic ABA reporter is based on repeats of the TACGTGTC abRE variant<sup>19</sup>.  
245 However, motif conservation analyses showed that this RE is poorly conserved while the  
246 ATnnAACACGTGG variant (Fig. 3D; Supplemental Table S8) is strongly conserved in highly responsive  
247 NCED genes. It would be interesting to assess whether such variants can be used to generate reporters  
248 with different degrees of sensitivity to the hormones. Further, the demonstration that position relative  
249 to the TSS is highly conserved for some REs, warrants maintenance of this relative position in synthetic  
250 promoters.

251 Finally, the advent of gene editing techniques has opened possibilities for generation of new alleles in  
252 important crops by directed mutagenesis of gene promoters. We propose that RE conservation can be  
253 used as a heuristic tool for identification of gene editing targets in order to generate new quantitative  
254 alleles for breeding purposes<sup>50</sup>.

255 **Figures**

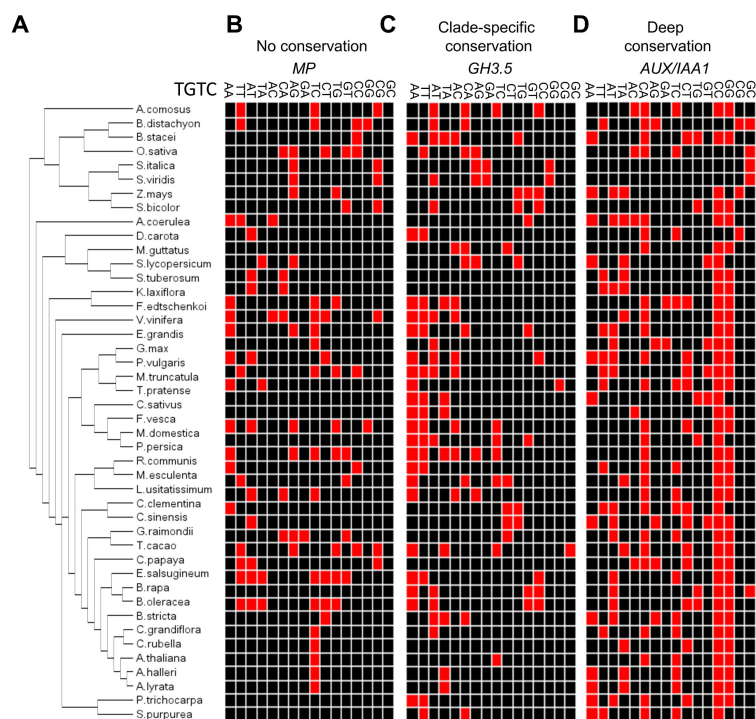

256

257 **Figure 1. Algorithm for identification of DNA motif variant conservation.** **A)** Phylogenetic tree of the  
 258 species used in this study. **B-D)** The occurrences of particular motif variants in orthologs of *MP* (**B**) *GH3.5*  
 259 (**C**) and *AUX/IAA1* (**D**). Red indicates the existence of the motif in the gene promoter.

260

261



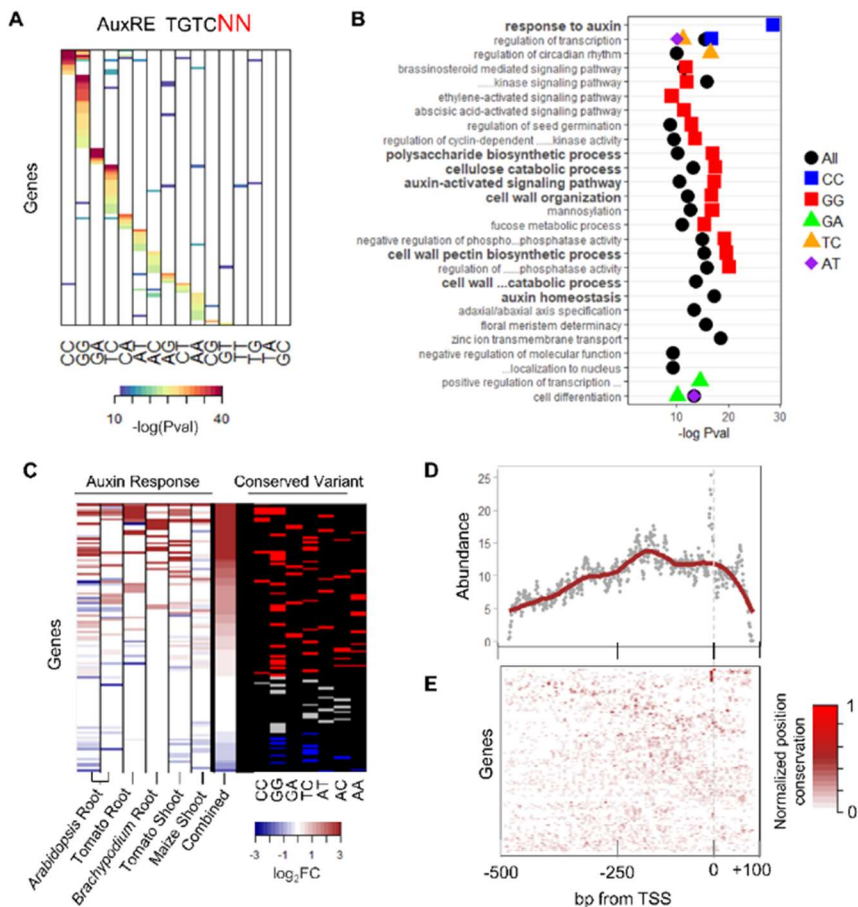

262

263 **Figure 2. Conservation of auxRE variants. A)** Genes and motif variants showing significant conservation.  
 264 Each column represents a specific dinucleotide variant of the TGTCNN motif. **B)** GO term enrichment of  
 265 genes with a conserved auxRE motif variant. **C)** Auxin responsiveness of genes with conserved auxRE  
 266 variants in different tissues and species. **D)** Mean abundance of conserved motifs in each position  
 267 relative to the TSS for all 45 angiosperms. **E)** Conservation of the auxRE motif position for each gene for  
 268 the 45 angiosperms species. High values (red) represent high conservation of the motif position.

269

270

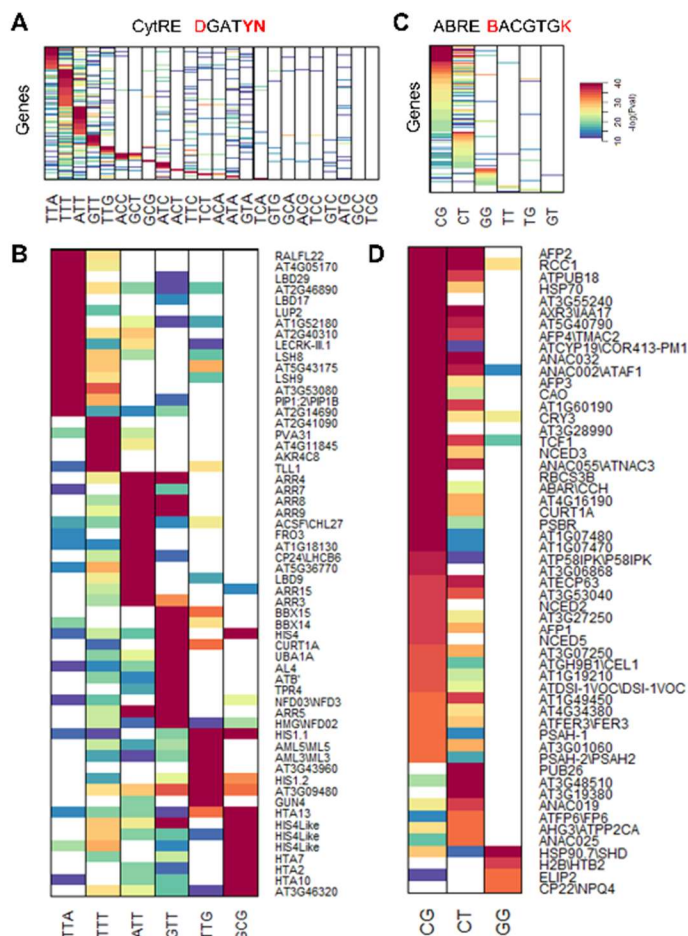

271

272 **Figure 3. Conservation of cytRE and abRE variants. A-D)** Conservation of cytRE (A-B) and abRE (C-D)  
 273 motif variants, all showing significant conservation (A,C) or just the genes with most highly conserved  
 274 motifs (B,D).

275

276

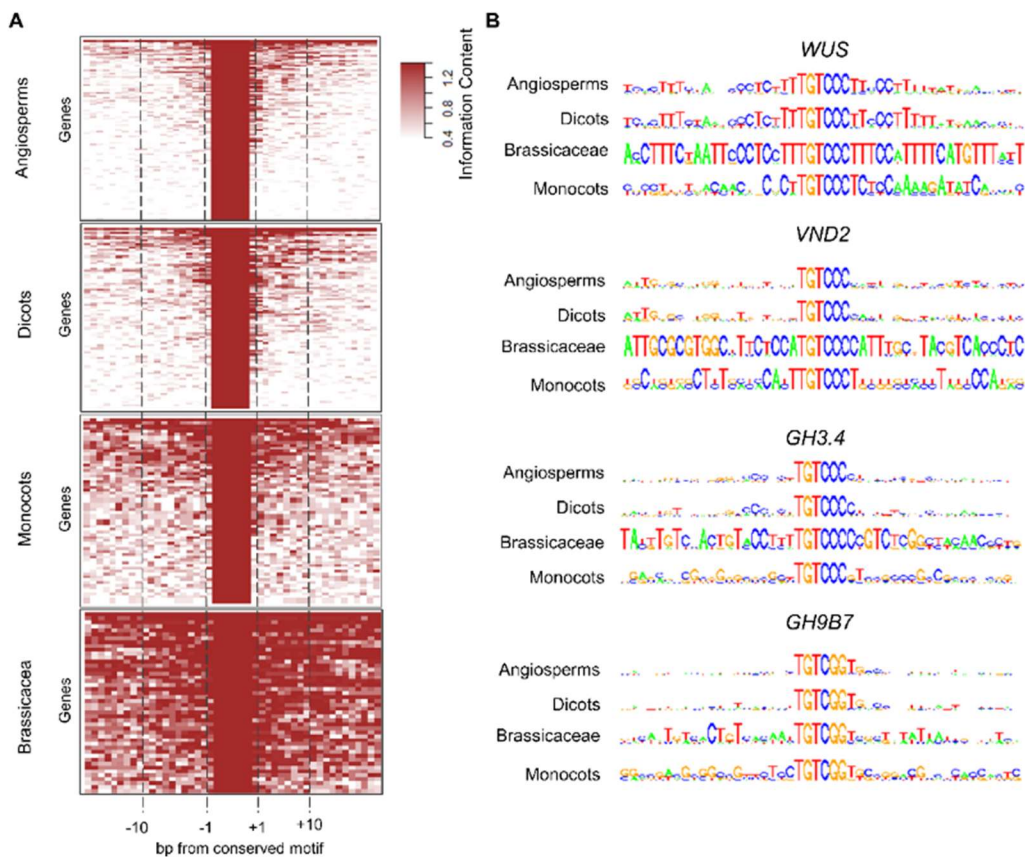

277

278 **Figure 4. Deep conservation of sequence context for conserved auxRE variants. A)** Information score  
 279 values computed from position weight matrix for sequences flanking the conserved auxRE. **B)** Position  
 280 weight matrix for sequences around the highly conserved auxRE variant.

281

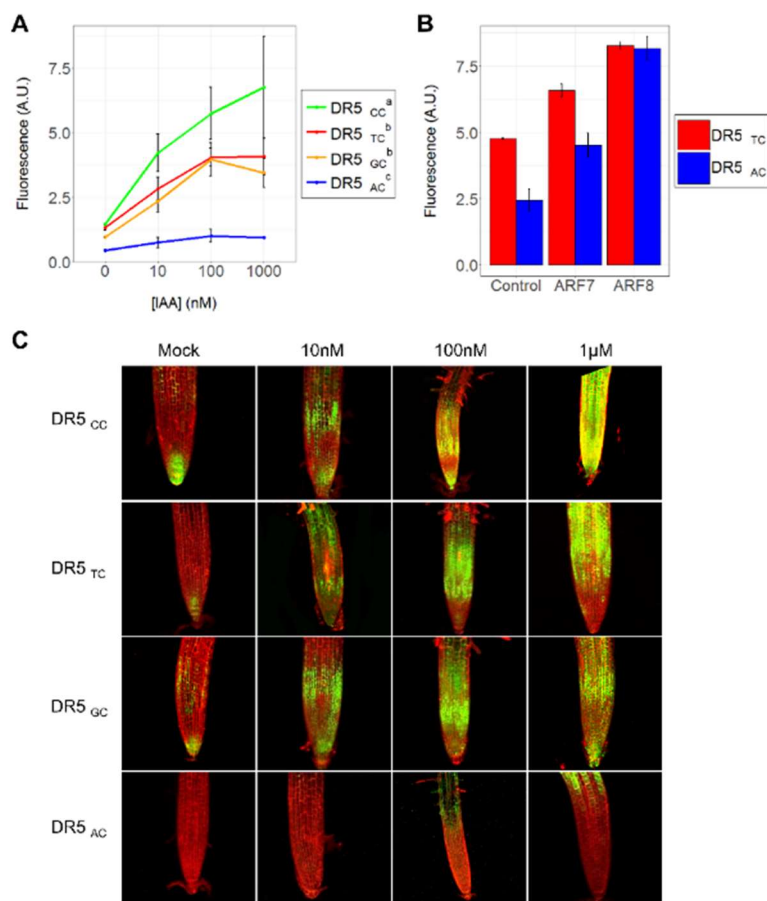

282

283 **Figure 5. Auxin responsiveness of different auxRE variants. A-B)** Mean normalized fluorescence of  
284 protoplasts transfected with variants of DR5 and treated with auxin for 6h (A) or with DR5 variants and  
285 an activating *ARF* (B). Experiments were performed in triplicates. Error bars represent standard error. (C)  
286 Maximal projection of confocal images of roots carrying GFP driven by different auxRE variants. Roots  
287 were treated with auxin for 6h.

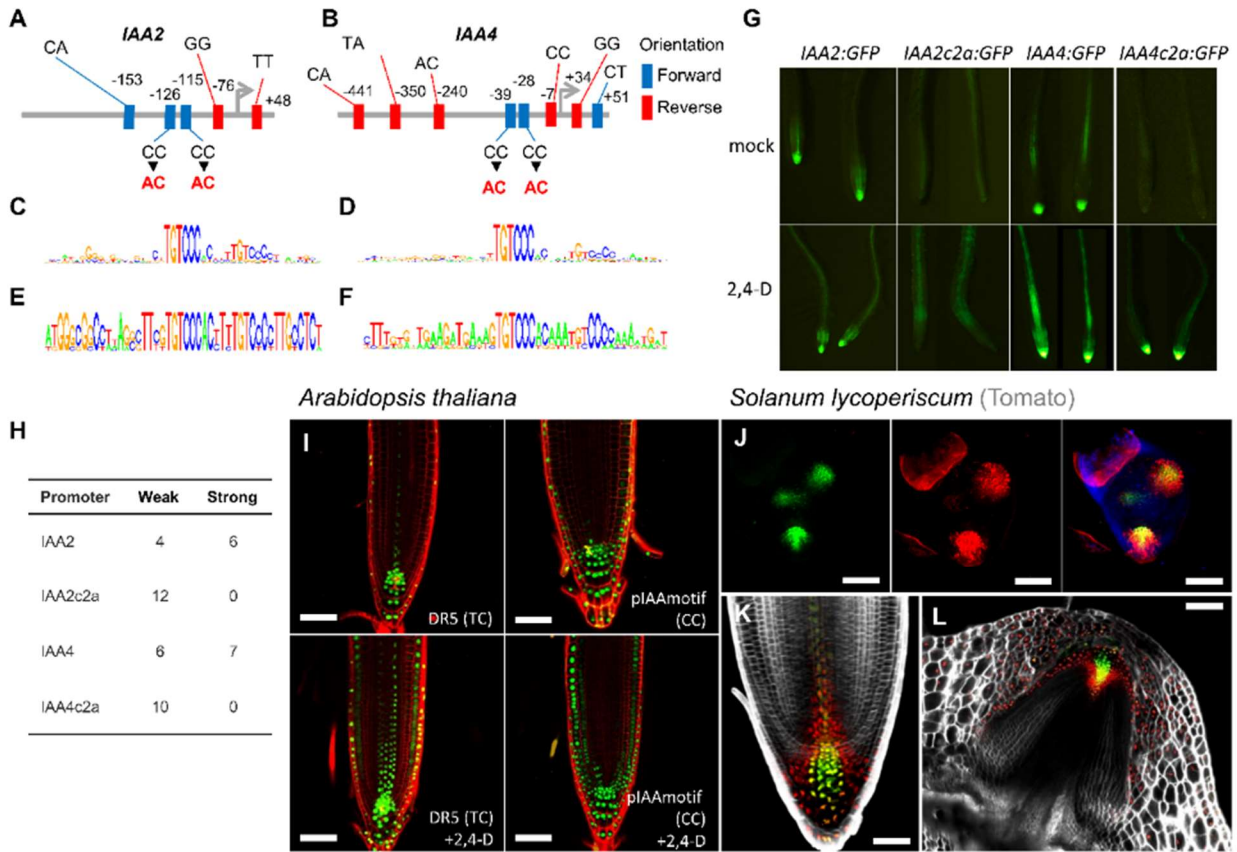

288

289 **Figure 6. auxRE variants generate predictable auxin response profiles in native and synthetic**  
 290 **promoters. A-B)** Diversity of auxRE motifs at the promoters of *Arabidopsis* IAA2 (A) and IAA4 (B). **C-F)**  
 291 PWM of the conserved TGTCC auxRE for IAA2 (C,E) and IAA4 (D,F) in all angiosperms (C-D) or within the  
 292 Brassicaceae (E-F). **G)** Response of promoters and mutated promoters to auxin. **H)** Number of  
 293 independent transformation lines exhibiting the same expression as in (G). **I)** Roots of 7 days old  
 294 *Arabidopsis* plants carrying DR5 and pIAAmotif:mNeonGreen-NLS treated with mock (top) or 1 $\mu$ M 2,4-D  
 295 (bottom). **J-L)** Shoot meristem (J), main root (K) and stem-borne root (L) of tomato carrying  
 296 DR5:3xVENUS-N7 (green) and pIAAmotif->opRFP (red). Blue in (J) is chlorophyll autofluorescence. Cell  
 297 wall stained with Propidium Iodide (I) or SR2200 (K-L).

298

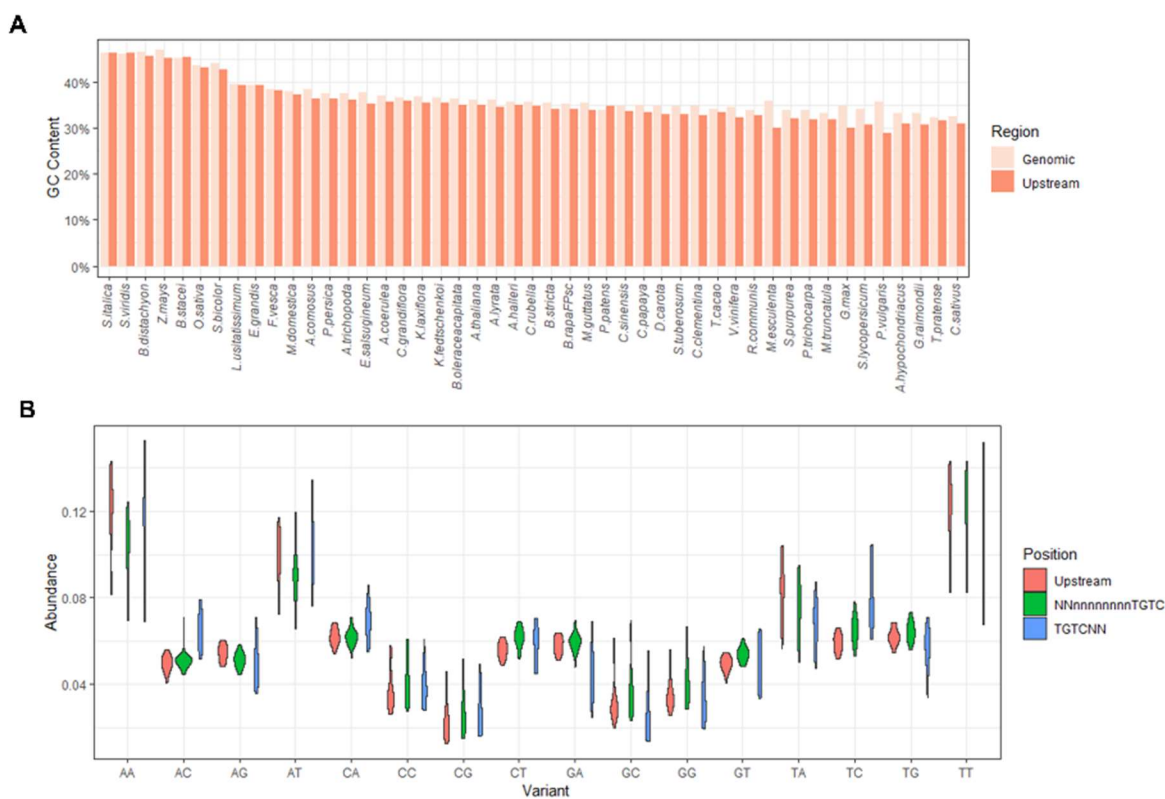

299

300 **Supplemental Figure 1. Genome properties of the angiosperms used in this study. A)** GC content in  
301 entire genome and in upstream regions for all genes in the species used in this study. **B)** Distribution of  
302 dinucleotides in different genomic regions for all species used in this study.

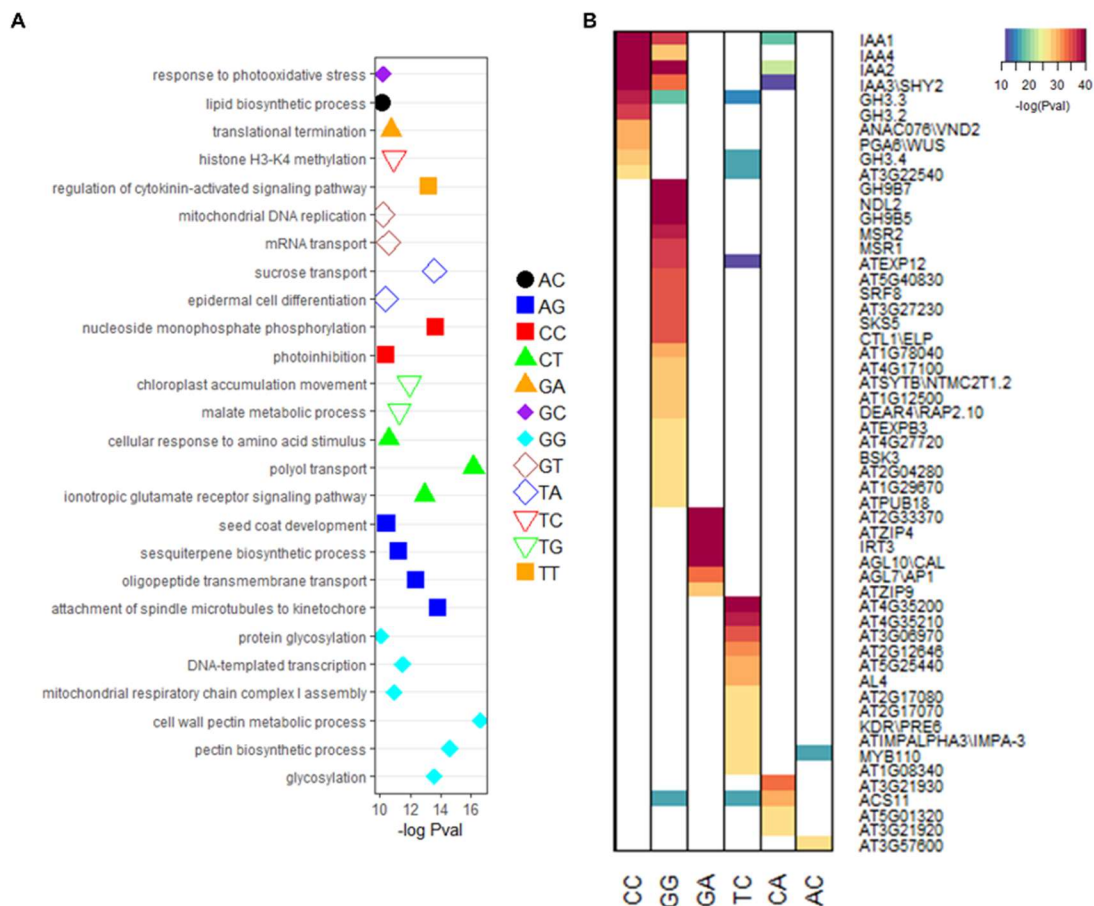

303

304 **Supplemental Figure 2. Conservation of auxRE variants. A)** GO term enrichment for genes which have  
 305 the auxRE variant in the promoter region in the *Arabidopsis* genome. **B)** Genes with most highly  
 306 conserved auxRE motif.

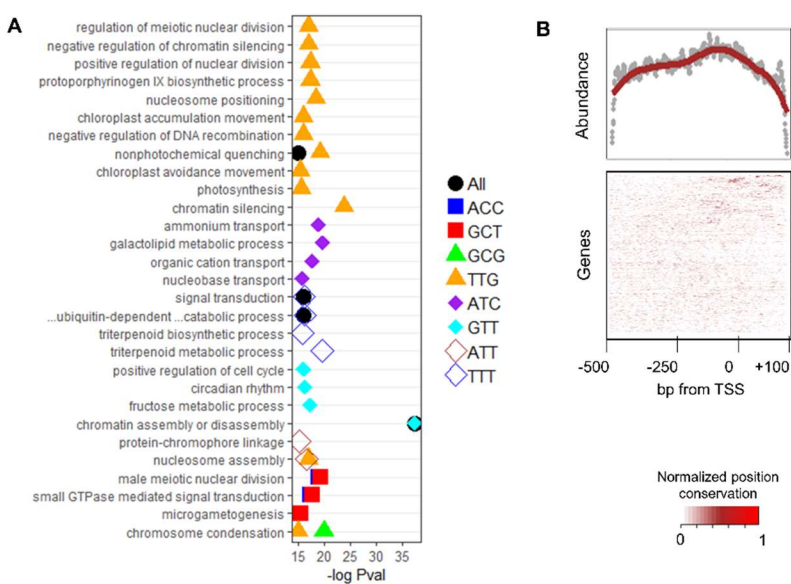

307

308 **Supplemental Figure 3. Conservation of cytRE variants. A)** GO term enrichment of genes with a  
 309 conserved cytRE motif variant. **B)** Mean abundance of the conserved motif in each position relative to  
 310 the TSS. **C)** Conservation of the cytRE motif position for each gene. High values (red) represent high  
 311 conservation of the motif position.



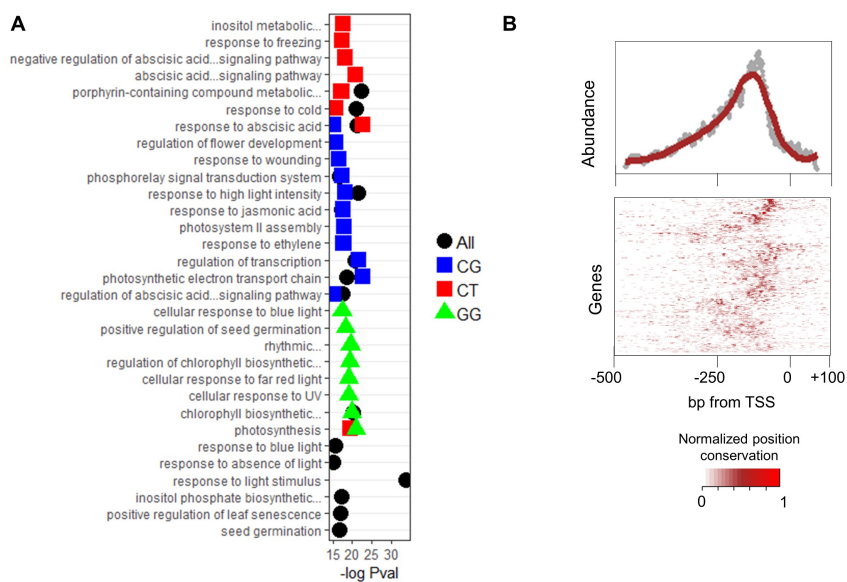

312

313 **Supplemental Figure 4. Conservation of abRE variants. A)** GO term enrichment of genes with a  
314 conserved abRE motif variant. **B)** Mean abundance of the conserved motif in each position relative to  
315 the TSS. **C)** Conservation of the abRE motif position for each gene. High values (red) represent high  
316 conservation of the motif position.

317

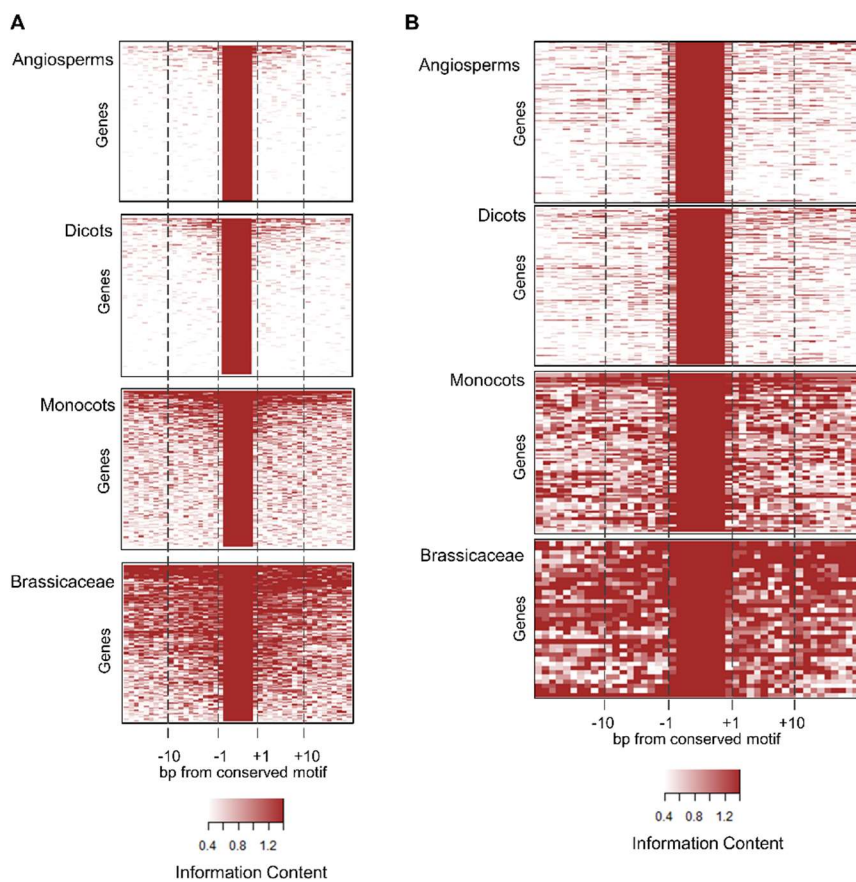

318

319 **Supplemental Figure 5. Deep conservation of sequence context for cytRE and abRE variants. A-B)**

320 Information score values computed from PWM for sequences flanking the conserved cytRE (A) and abRE

321 (B) motifs.



330 **Supplemental Table 1. List of genomes used in this study**

331 **Supplemental Table 2. Ortholog candidates for all genes in the species used in this study**

332 **Supplemental Table 3. List of genes with conserved auxRE motifs**

333 **Supplemental Table 4. List of genes with conserved cytRE motifs**

334 **Supplemental Table 5. List of genes with conserved abRE motifs**

335 **Supplemental Table 6. Sequence conservation of sequence flanking conserved auxRE motifs**

336 **Supplemental Table 7. Sequence conservation of sequence flanking conserved cytRE motifs**

337 **Supplemental Table 8. Sequence conservation of sequence flanking conserved abRE motifs**

338

339 **Material and Methods**

340 **Plant growth and imaging**

341 *Arabidopsis* seeds were planted on ½ Murashige and Skoog agar plates, kept for 48h in the dark at 4°C  
342 and transferred to a growth chamber at 21°C in continuous light. Tomatoes were germinated in a growth  
343 chamber and moved to a temperature-controlled greenhouse with natural light (26°C/day 18°C/night).  
344 Transgenic *Arabidopsis* were generated using floral dipping. Transgenic tomatoes were generated using  
345 *Agrobacterium* (strain GV3103)-mediated cotyledon transformation. Images were taken using a Nikon  
346 SMZ18 fluorescence stereoscope, with identical settings for all images. Confocal microscopy was  
347 performed using a Leica SP8. For *Arabidopsis* roots propidium iodide was used to stain cell walls.  
348 Tomato lines carrying the pIAAmotif:LhG4 driver were crossed to plants carrying op:mRFP. Tomato roots  
349 and adventitious roots were fixed and cleared using ClearSee<sup>51</sup>, cell wall stained was performed using  
350 SR2200 (Renaissance Chemicals) prior to mounting and visualization using 405nm, 488nm and 561nm  
351 lasers. To image the shoot meristem, live tomato shoots were dissected, mounted in gel and imaged  
352 using a Zeiss Lightsheet Z.1.

353 **Construct generation**

354 For the protoplast assay, DNA for the four DR5 variants was synthesized and cloned, using Gateway,  
355 upstream to a minimal 35S promoter fused to Venus. To generate transgenic *Arabidopsis*, the same  
356 variants were cloned, using Gateway, to the pKGWFS7 plasmid, upstream to a GFP-GUS fusion protein.  
357 For ARF overexpression, the coding sequence was cloned, using Gateway, into a p2GW7,0 plasmid. To  
358 generate the pIAA2 and pIAA4 promoter, the sequences 1200bp and 1500bp upstream, respectively,  
359 were amplified and cloned into pENTR using Gateway. Site-directed mutagenesis was used to replace  
360 the TGTCCC motifs with TGTCAC. The fragments were then shuttled to the pKGWFS7 vector.

361 The synthetic auxin reporter pIAA motif was constructed by cloning the TGCCCC-containing regulatory  
362 regions of the IAA1 ortholog from *Populus trichocarpa*, IAA1 from *Arabidopsis* and IAA2 from  
363 *Arabidopsis*, upstream to a minimal 35S promoter. For *Arabidopsis* lines, the three segments were  
364 cloned into a level 0 MoClo part using Golden Gate and then fused to *mNeonGreen-N7* and a heat shock  
365 protein terminator to form a level 1 construct. The level 1 was transferred to a level 2, together with a  
366 kanamycin resistance cassette. For tomato transformation, the synthetic promoter was cloned upstream  
367 to LhG4 using restriction cloning, and then subcloned into pART27.

### 368 **Protoplast assay**

369 *Arabidopsis* plants were grown on agar plates as described above. At 7 days after transfer to light,  
370 protoplasts were extracted and transfected with 10 $\mu$ g plasmid carrying the synthetic reporter fused to  
371 VENUS, together with a transfection control of 10 $\mu$ g pMon plasmid, carrying *35S:RFP*, according to  
372 (Bargmann et al.<sup>52</sup>). Cell aliquots were treated with 1 $\mu$ M 2,4-D or mock for 6h. Mean YFP and RFP  
373 fluorescence of at least 10,000 cells was measured using a BD Accuri 6 plus analyzer. The mean RFP  
374 signal was used to normalize the YFP signal. Experiments were performed in triplicates.

### 375 **Ortholog calling**

376 For each species, a reciprocal blast was performed between all proteins and the *Arabidopsis* protein  
377 sequences using a minimum E-value of 1E-10. Orthologs were ranked based on E-value. An ortholog  
378 quality score for each gene was computed as the combined rank in the reciprocal blast, with 2 being the  
379 highest score. Gene pairs were sorted based on ortholog quality score and the genes with lowest scores  
380 (up to eight) were considered as putative orthologs. The mean number of putative orthologs per  
381 species, for each *Arabidopsis* gene was 2.61 $\pm$ 0.34 genes.

### 382 **Computational identification of motif conservation**

383 Genome sequences and annotation gff3 files were obtained from phytozone 12 and a perl script was  
384 used to generate upstream sequences and identify the motifs variants for each gene. Upstream  
385 sequences included 500bp upstream and 100bp downstream to the annotated TSS. Calculation of  
386 conservation scores were performed as followed. For each *Arabidopsis* gene, the orthologs for all  
387 species were obtained, as described above. Of the putative orthologs for a given species, the one with a  
388 motif variant composition most similar to the *Arabidopsis* gene was selected as an ortholog. The motif  
389 variants for each gene were arrange on a predefined species tree. Maximum parsimony method was  
390 used to derive the motif variants on the internal nodes. The conservation score for each motif variant  
391 was calculated as the number of occurrences of the variant in the tree minus the number of changes  
392 (gain or loss) this variant had across the tree. To determine the background distribution, conservation  
393 scores of nucleotides at positions 8bp away from the core motif, were calculated for all genes. A  
394 negative binomial distribution was fitted to the overall conservation score for all variants at position -  
395 8bp. This fitted distribution was used to compute p-values for the conservation of the motif variants.  
396 Significance cutoffs for the  $-\log_2(\text{pval})$  were set to 23, 21 and 35 for the auxRE, abRE and cytRE motifs,  
397 respectively. The R source code is deposited at <https://github.com/idanefroni/CoMoVa>.

## 398 GO term analysis

399 GO term analysis was performed for the Arabidopsis orthologs of the genes with conserved motifs, using  
400 the topGO package with the “weight01” algorithm. P-values were calculated using the hypergeometric  
401 test without further correction to multiple testing. Enrichment testing was performed for each variant  
402 individually and then for the entire list of genes with conserved variants.

## 403 Identification of auxin responsive genes

404 For the root response, tomato seedlings were germinated on ½ Murashige and Skoog plates and grown  
405 in a growth chamber at 22C under continuous light. 4 days after germination, were transferred to plates  
406 containing 1µM of the auxin analog 2,4-D (Sigma D7299) for 3h, followed by excision of 1cm root tips  
407 and flash freezing in liquid nitrogen. For shoot samples, three-week-old M82 plants were sprayed with  
408 either mock or 1 µM of the auxin analog Picloram (Sigma P5575) for 3 hours and 15 young leaf primordia  
409 (Leaf number 5 at the P5 stage) were collected and flash frozen. RNA-extraction was performed using  
410 Qiagen RNeasy Microkit and sequencing libraries prepared using Lexigen 3’ Quant-Seq kit, according to  
411 the manufacturer instructions. Experiments were performed in duplicates or triplicates. Single-end  
412 sequencing was performed using Illumina Nextseq 500. Expression calling was performed using Salmon  
413 0.8.2, by aligning to the tomato genome ITAG3.2. As the library is 3’ biased, we extended all genes to  
414 cover 500 additional base pairs downstream. Expression data were normalized using Deseq2 and genes  
415 induced at False Discovery Rate (FDR) <0.01 were selected. Tomato auxin response data was submitted  
416 to GEO (GSExxx). Processed expression values for the *Arabidopsis* and *Brachypodium* root auxin  
417 response were obtained from previously published analysis<sup>7 35</sup>. Maize auxin response data was obtained  
418 from GEO (GSE111792), aligned to the maize transcriptome (AGPv3, obtained from Phytozone) and  
419 auxin responsive genes were identified as above.

## 420 References

- 421 1. Roosjen, M., Paque, S. & Weijers, D. Auxin Response Factors: Output control in auxin biology. *J.*  
422 *Exp. Bot.* **69**, 179–188 (2018).
- 423 2. Kieber, J. J. & Schaller, G. E. Cytokinin signaling in plant development. *Development* **145**,  
424 dev149344 (2018).
- 425 3. Choi, H., Hong, J., Ha, J., Kang, J. & Kim, S. Y. ABFs, a Family of ABA-responsive Element Binding  
426 Factors. *J. Biol. Chem.* **275**, 1723–1730 (2000).
- 427 4. Bhargava, A. *et al.* Identification of Cytokinin-Responsive Genes Using Microarray Meta-Analysis  
428 and RNA-Seq in Arabidopsis. *Plant Physiol.* **162**, 272–294 (2013).
- 429 5. Zemlyanskaya, E. V., Wiebe, D. S., Omelyanchuk, N. A., Levitsky, V. G. & Mironova, V. V. Meta-  
430 analysis of transcriptome data identified TGTCNN motif variants associated with the response to  
431 plant hormone auxin in Arabidopsis thaliana L. *J. Bioinform. Comput. Biol.* **14**, 1641009 (2016).
- 432 6. Omelyanchuk, N. A. *et al.* Auxin regulates functional gene groups in a fold-change-specific  
433 manner in Arabidopsis thaliana roots. *Sci. Rep.* **7**, 2489 (2017).

- 434 7. Bargmann, B. O. R. *et al.* A map of cell type-specific auxin responses. *Mol. Syst. Biol.* **9**, 688  
435 (2013).
- 436 8. Mutte, S. K. *et al.* Origin and evolution of the nuclear auxin response system. *Elife* **7**, e33399  
437 (2018).
- 438 9. Ulmasov, T., Liu, Z. B., Hagen, G. & Guilfoyle, T. J. Composite structure of auxin response  
439 elements. *Plant Cell* **7**, 1611–23 (1995).
- 440 10. Abel, S., Ballas, N., Wong, L. M. & Theologis, A. DNA elements responsive to auxin. *BioEssays* **18**,  
441 647–54 (1996).
- 442 11. Ballas, N., Wong, L. M., Ke, M. & Theologis, A. Two auxin-responsive domains interact positively  
443 to induce expression of the early indoleacetic acid-inducible gene PS-IAA4/5. *Proc. Natl. Acad.*  
444 *Sci. U. S. A.* **92**, 3483–7 (1995).
- 445 12. Ulmasov, T., Murfett, J., Hagen, G. & Guilfoyle, T. J. Aux/IAA proteins repress expression of  
446 reporter genes containing natural and highly active synthetic auxin response elements. *Plant Cell*  
447 **9**, 1963–71 (1997).
- 448 13. Boer, D., Freire-Rios, A. & Berg, W. van den. Structural Basis for DNA Binding Specificity by the  
449 Auxin-Dependent ARF Transcription Factors. *Cell* **156**, 577–89 (2014).
- 450 14. Ulmasov, T., Hagen, G. & Guilfoyle, T. J. Dimerization and DNA binding of auxin response factors.  
451 *Plant J.* **19**, 309–19 (1999).
- 452 15. Potter, K. C., Wang, J., Schaller, G. E. & Kieber, J. J. Cytokinin modulates context-dependent  
453 chromatin accessibility through the type-B response regulators. *Nat. Plants* **4**, (2018).
- 454 16. Zubo, Y. O. *et al.* Cytokinin induces genome-wide binding of the type-B response regulator ARR10  
455 to regulate growth and development in *Arabidopsis*. *Proc. Natl. Acad. Sci.* **114**, E5995–E6004  
456 (2017).
- 457 17. Xie, M. *et al.* A B-ARR-mediated cytokinin transcriptional network directs hormone cross-  
458 regulation and shoot development. *Nat. Commun.* **9**, 1–13 (2018).
- 459 18. Zürcher, E. *et al.* A robust and sensitive synthetic sensor to monitor the transcriptional output of  
460 the cytokinin signaling network in planta. *Plant Physiol.* **161**, 1066–75 (2013).
- 461 19. Wu, R. *et al.* The 6xABRE Synthetic Promoter Enables the Spatiotemporal Analysis of ABA-  
462 Mediated Transcriptional Regulation. *Plant Physiol.* **177**, 1650–1665 (2018).
- 463 20. Hattori, T., Totsuka, M., Hobo, T., Kagaya, Y. & Yamamoto-Toyoda, A. Experimentally determined  
464 sequence requirement of ACGT-containing abscisic acid response element. *Plant Cell Physiol.* **43**,  
465 136–40 (2002).
- 466 21. Liao, C.-Y. *et al.* Reporters for sensitive and quantitative measurement of auxin response. *Nat.*  
467 *Methods* **12**, 207–210 (2015).
- 468 22. Graur, D., Zheng, Y. & Azevedo, R. B. R. An evolutionary classification of genomic function.  
469 *Genome Biol. Evol.* **7**, 642–5 (2015).

- 470 23. Kim, D. W. *et al.* Functional Conservation of a Root Hair Cell-Specific cis-Element in Angiosperms  
471 with Different Root Hair Distribution Patterns. *Plant Cell Online* **18**, 2958–2970 (2006).
- 472 24. Korkuc, P., Schippers, J. H. M. & Walther, D. Characterization and Identification of cis-Regulatory  
473 Elements in Arabidopsis Based on Single-Nucleotide Polymorphism Information. *Plant Physiol.*  
474 **164**, 181–200 (2014).
- 475 25. Vandepoele, K., Quimbaya, M., Casneuf, T., De Veylder, L. & Van de Peer, Y. Unraveling  
476 Transcriptional Control in Arabidopsis Using cis-Regulatory Elements and Coexpression Networks.  
477 *Plant Physiol.* **150**, 535–546 (2009).
- 478 26. Elemento, O. & Tavazoie, S. Fast and systematic genome-wide discovery of conserved regulatory  
479 elements using a non-alignment based approach. *Genome Biol.* **6**, R18 (2005).
- 480 27. Gordân, R., Narlikar, L. & Hartemink, A. J. Finding regulatory DNA motifs using alignment-free  
481 evolutionary conservation information. *Nucleic Acids Res.* **38**, e90 (2010).
- 482 28. De Witte, D. *et al.* BLSSpeller: exhaustive comparative discovery of conserved cis-regulatory  
483 elements. *Bioinformatics* **31**, 3758–66 (2015).
- 484 29. Ivan, A., Halfon, M. S. & Sinha, S. Computational discovery of cis-regulatory modules in  
485 *Drosophila* without prior knowledge of motifs. *Genome Biol.* **9**, 1–17 (2008).
- 486 30. Kantorovitz, M. R., Robinson, G. E. & Sinha, S. A statistical method for alignment-free comparison  
487 of regulatory sequences. *Bioinformatics* **23**, 249–255 (2007).
- 488 31. Chaw, S. M., Chang, C. C., Chen, H. L. & Li, W. H. Dating the monocot-dicot divergence and the  
489 origin of core eudicots using whole chloroplast genomes. *J. Mol. Evol.* **58**, 424–441 (2004).
- 490 32. Mironova, V. V, Omelyanchuk, N. A., Wiebe, D. S. & Levitsky, V. G. Computational analysis of  
491 auxin responsive elements in the Arabidopsis thaliana L. genome. *BMC Genomics* **15 Suppl 1**, S4  
492 (2014).
- 493 33. Gentles, A. J. & Karlin, S. Genome-scale compositional comparisons in eukaryotes. *Genome Res.*  
494 **11**, 540–6 (2001).
- 495 34. Abel, S. & Theologis, A. Early genes and auxin action. *Plant Physiol.* **111**, 9–17 (1996).
- 496 35. Lewis, D. R. *et al.* A kinetic analysis of the auxin transcriptome reveals cell wall remodeling  
497 proteins that modulate lateral root development in Arabidopsis. *Plant Cell* **25**, 3329–46 (2013).
- 498 36. Schoof, H. *et al.* The stem cell population of Arabidopsis shoot meristems is maintained by a  
499 regulatory loop between the CLAVATA and WUSCHEL genes. *Cell* **100**, 635–44 (2000).
- 500 37. Tan, T. T. *et al.* Transcription Factors VND1-VND3 Contribute to Cotyledon Xylem Vessel  
501 Formation. *Plant Physiol.* **176**, 773–789 (2018).
- 502 38. Yang, Y. Z. & Tan, B. C. A distal ABA responsive element in AtNCED3 promoter is required for  
503 positive feedback regulation of ABA biosynthesis in arabidopsis. *PLoS One* **9**, 1–10 (2014).
- 504 39. Barrero, J. M. *et al.* Both abscisic acid (ABA)-dependent and ABA-independent pathways govern  
505 the induction of NCED3, AAO3 and ABA1 in response to salt stress. *Plant, Cell Environ.* **29**, 2000–



- 506 2008 (2006).
- 507 40. Garcia, M. E., Lynch, T., Peeters, J., Snowden, C. & Finkelstein, R. A small plant-specific protein  
508 family of ABI five binding proteins (AFPs) regulates stress response in germinating Arabidopsis  
509 seeds and seedlings. *Plant Mol. Biol.* **67**, 643–58 (2008).
- 510 41. Dror, I., Golan, T., Levy, C. & Rohs, R. A widespread role of the motif environment on  
511 transcription factor binding across diverse protein families. *Genome Res.* **25**, 1268–80 (2015).
- 512 42. Galli, M. *et al.* The DNA binding landscape of the maize AUXIN RESPONSE FACTOR family. *Nat.*  
513 *Commun.* **9**, 4526 (2018).
- 514 43. Franzke, A., Lysak, M. A., Al-Shehbaz, I. A., Koch, M. A. & Mummenhoff, K. Cabbage family affairs:  
515 the evolutionary history of Brassicaceae. *Trends Plant Sci.* **16**, 108–16 (2011).
- 516 44. O’Malley, R. C. *et al.* Cistrome and Epicistrome Features Shape the Regulatory DNA Landscape.  
517 *Cell* **165**, 1280–1292 (2016).
- 518 45. Stigliani, A. *et al.* Capturing auxin response factors syntax using DNA binding models. *Mol. Plant*  
519 **S1674–2052(18)30306–X** (2018).
- 520 46. Swarup, R. *et al.* Localization of the auxin permease AUX1 suggests two functionally distinct  
521 hormone transport pathways operate in the Arabidopsis root apex. *Genes Dev.* **15**, 2648–53  
522 (2001).
- 523 47. Grieneisen, V. A., Xu, J., Marée, A. F. M., Hogeweg, P. & Scheres, B. Auxin transport is sufficient to  
524 generate a maximum and gradient guiding root growth. *Nature* **449**, 1008–13 (2007).
- 525 48. Schaller, G. E., Street, I. H. & Kieber, J. J. Cytokinin and the cell cycle. *Curr. Opin. Plant Biol.* **21**, 7–  
526 15 (2014).
- 527 49. Franco-Zorrilla, J. M. *et al.* DNA-binding specificities of plant transcription factors and their  
528 potential to define target genes. *Proc. Natl. Acad. Sci.* **111**, 2367–2372 (2014).
- 529 50. Rodríguez-Leal, D., Lemmon, Z. H., Man, J., Bartlett, M. E. & Lippman, Z. B. Engineering  
530 Quantitative Trait Variation for Crop Improvement by Genome Editing. *Cell* **171**, 470–480.e8  
531 (2017).
- 532 51. Kurihara, D., Mizuta, Y., Sato, Y. & Higashiyama, T. ClearSee: a rapid optical clearing reagent for  
533 whole-plant fluorescence imaging. *Development* **142**, 4168–79 (2015).
- 534 52. Bargmann, B. O. R. & Birnbaum, K. D. Positive fluorescent selection permits precise, rapid, and in-  
535 depth overexpression analysis in plant protoplasts. *Plant Physiol.* **149**, 1231–9 (2009).

536
